# Supplementary material for: The function of the ophiuroid nerve ring: how a decentralized nervous system controls coordinated locomotion
Source: Oxford University Press journal article supplement (doi:10.1242/jeb.192104), 2018-01-01
Supplement: jeb192104supp.pdf [file jeb192104supp.pdf]

## Supplementary Tables

Table S1: Measurements of arms and disks of specimens used in experiments.

[Click here to Download Table S1](#)

Table S2: Experiment details.

[Click here to Download Table S2](#)
